# Supplementary material
Source: PubMed Central journal article supplement (PMC2949119)

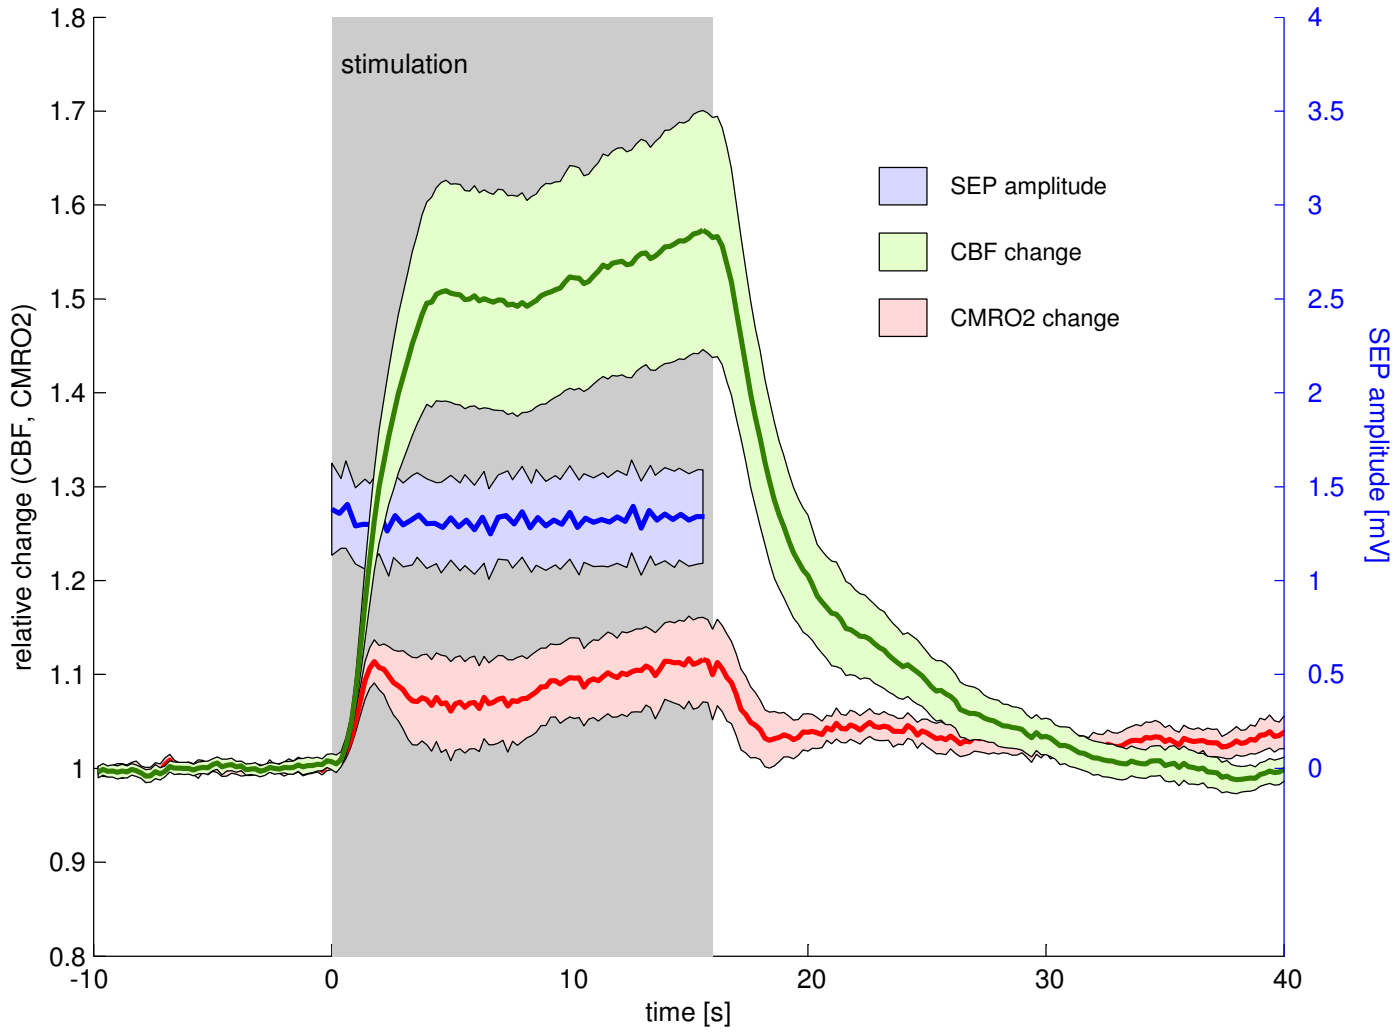

Supplement: jcbfm2009211x1.pdf [file jcbfm2009211x1.pdf]

A) Full CBF response

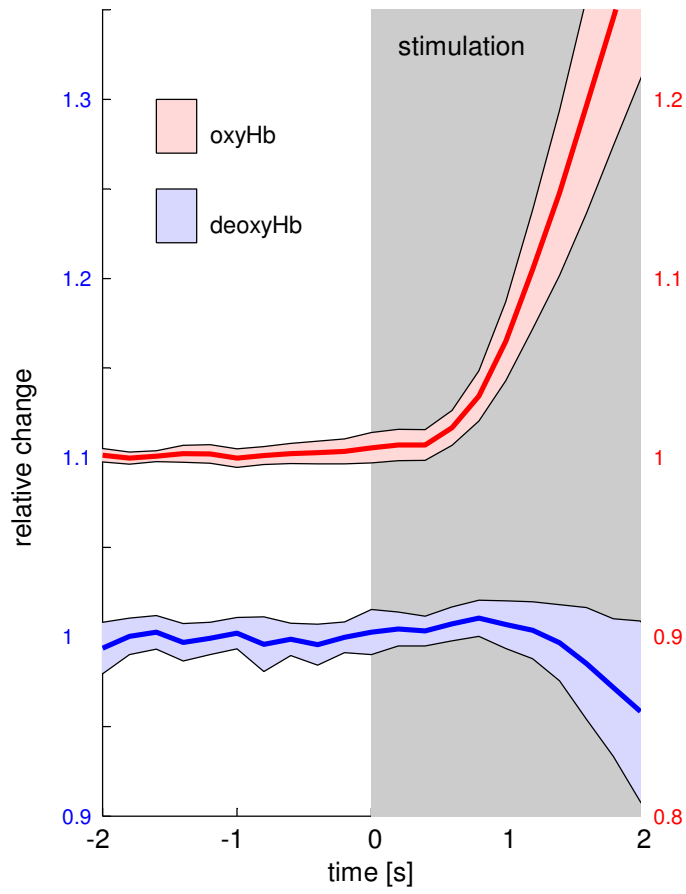

B) CBF response reduced

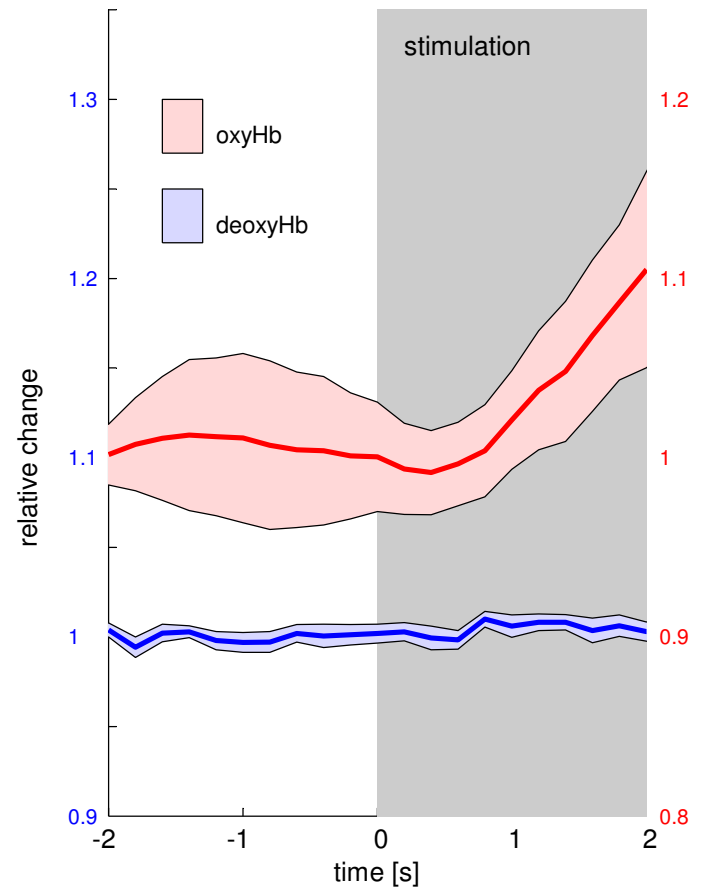

Supplement: jcbfm2009211x2.pdf [file jcbfm2009211x2.pdf]

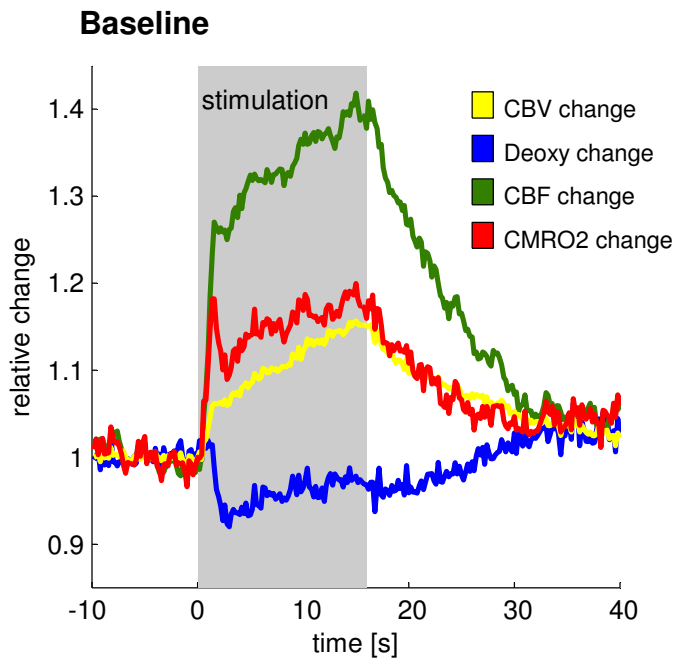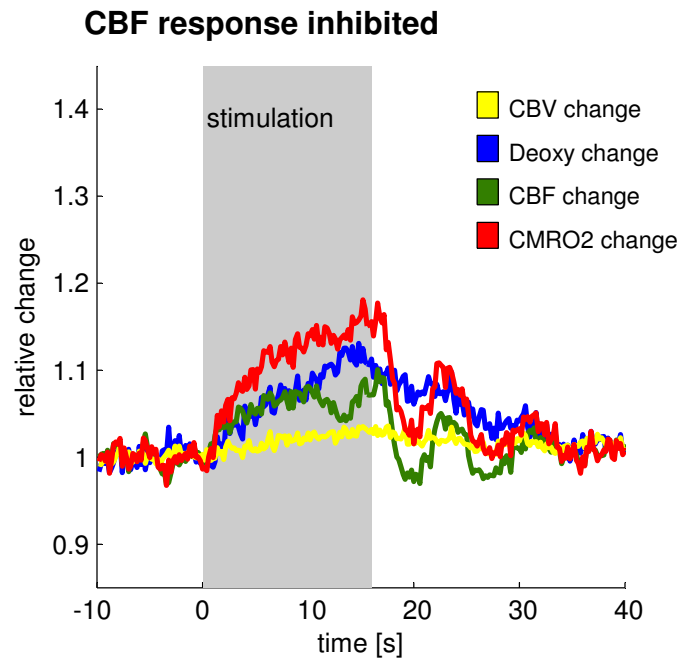

Supplement: jcbfm2009211x3.pdf [file jcbfm2009211x3.pdf]

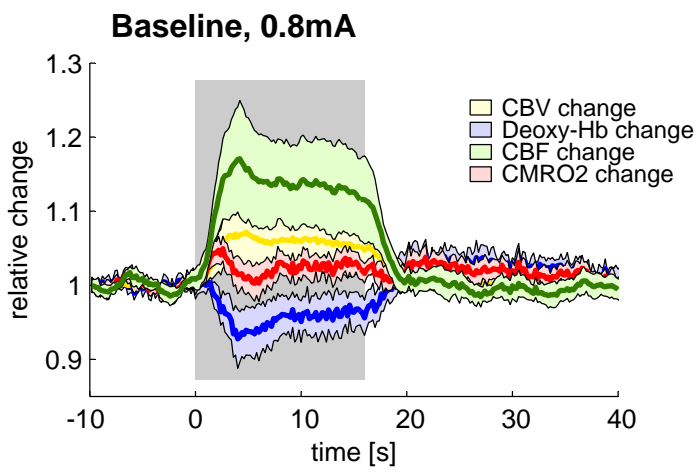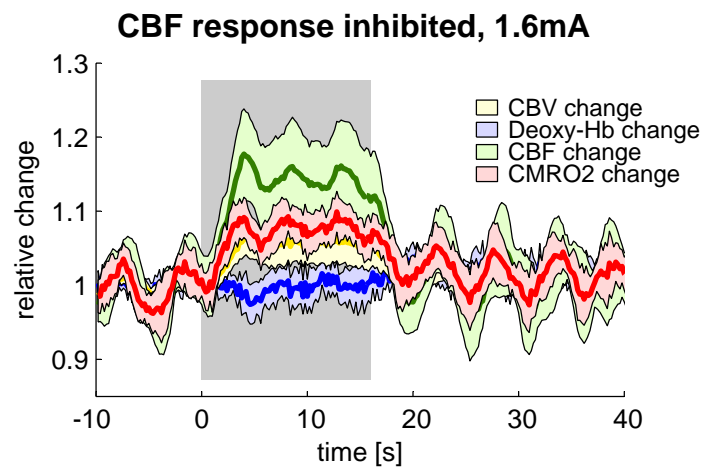

Supplement: jcbfm2009211x4.pdf [file jcbfm2009211x4.pdf]

### CBF CMRO<sub>2</sub> uncoupling

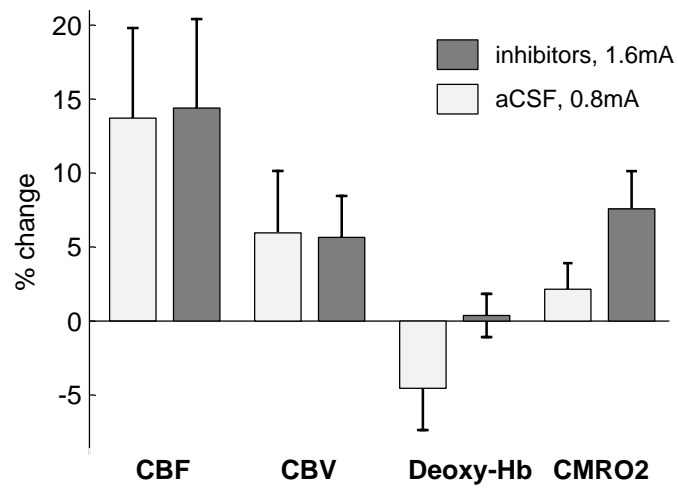

Supplement: jcbfm2009211x5.pdf [file jcbfm2009211x5.pdf]
